# Supervised Phenotype Discovery from Multimodal Brain Imaging

Weikang Gong<sup>a</sup>, Song Bai<sup>b</sup>, Ying-Qiu Zheng<sup>a</sup>, Stephen M. Smith<sup>a</sup>, Christian F. Beckmann<sup>a,c,d</sup>

<sup>a</sup>Centre for Functional MRI of the Brain (FMRIB), Nuffield Department of Clinical Neurosciences, Wellcome Centre for Integrative Neuroimaging, University of Oxford, Oxford, UK.

<sup>b</sup>Department of Engineering Science, University of Oxford, Oxford, UK.

<sup>c</sup>Radboud University Medical Centre, Department of Cognitive Neuroscience, Nijmegen, Netherlands.

<sup>d</sup>Donders Institute for Brain, Cognition and Behaviour, Radboud University Nijmegen, Nijmegen, Netherlands.

---

## Abstract

Data-driven discovery of image-derived phenotypes (IDPs) from large-scale multimodal brain imaging data has enormous potential for neuroscientific and clinical research by linking IDPs to subjects' demographic, behavioural, clinical and cognitive measures (i.e., non-imaging derived phenotypes or nIDPs). However, current approaches are primarily based on unsupervised approaches, without use of information in nIDPs. In this paper, we proposed Supervised BigFLICA (SuperBigFLICA), a semi-supervised, multimodal, and multi-task fusion approach for IDP discovery, which simultaneously integrates information from multiple imaging modalities as well as multiple nIDPs. SuperBigFLICA is computationally efficient and largely bypasses the need for parameter tuning. Using the UK Biobank brain imaging dataset with around 40,000 subjects and 47 modalities, along with more than 17,000 nIDPs, we showed that SuperBigFLICA enhances the prediction power of nIDPs, benchmarked against IDPs derived by conventional expert-knowledge and unsupervised-learning approaches (with average nIDP prediction accuracy improvements of up to 46%). It also enables learning of generic imaging features that can predict new nIDPs. Further empirical analysis of the SuperBigFLICA algorithm demonstrates its robustness in different prediction tasks and the ability to derive biologically meaningful IDPs in predicting health outcomes and cognitive nIDPs, such as fluid intelligence and hypertension scores.

*Keywords:* Multimodality, Brain imaging, UK Biobank, Imaging-derived phenotypes, Non-imaging derived phenotypes.

---

## 1. Introduction

1 Large-scale population neuroimaging datasets, such as the data from UK Biobank, provide high-quality  
2 multimodal magnetic resonance imaging (MRI) data, with the potential for generating markers of psychiatric  
3 and neurodegenerative diseases and uncovering the neural basis of cognition through linking across imaging  
4 features to behavioural or genetic data (Miller et al., 2016). However, such massive high-dimensional data make  
5 statistical modelling challenging due to their multimodal nature and cohort size. Therefore, instead of working  
6 directly from voxel-level spatial maps, it is becoming popular to reduce these maps into summary measures,  
7 sometimes referred to as 'imaging-derived phenotypes (IDPs)' (Gong et al., 2021; Dadi et al., 2020; Elliott et al.,  
8 2018). IDPs can be spatial summary statistics such as global and regionally averaged tissue volumes, while  
9 other IDPs can be measures of functional and structural connectivity or tissue biology. Building statistical  
10 models from an informative set of IDPs can significantly reduce the computational burden and, compared to  
11 working from voxel-wise data, has a similar or even improved signal-to-noise ratio for use in associations with  
12 non-imaging variables and predictive analysis linking to, e.g., behaviour and genetics.

13 Methods for deriving IDPs can be divided into two categories, one expert-knowledge-based and the other  
14 data-driven. The former approaches are typically concerned with extracting summary signals from pre-defined  
15 anatomy or functional brain atlases (Eickhoff et al., 2018). Although simple and efficient, this approach has a  
16 few limitations. First, the atlases may not be equally valid across different areas of the brain. For example,  
17 existing atlases typically provide fine-grained delineations across sensory cortices and less detailed across mul-  
18 timodal association cortices. These differences may result in increased inter-individual differences across dif-  
19 ferent brain areas, potentially masking the signal of interest. Second, these regional characterisations are often  
20 derived from underlying features that may not appropriately map onto different data modalities. For example,  
21 atlases based on cytoarchitectonic features may differentially be suitable for IDPs reflecting regional cortical  
22 thickness but may be less suitable for summarising measures of functional connectivity. Furthermore, with  
23

---

\* Correspondence should be addressed to: Weikang Gong. E-mail: [weikang.gong@ndcn.ox.ac.uk](mailto:weikang.gong@ndcn.ox.ac.uk)

\*\* SS and CB are co-senior authors.

24 multimodal data, expert-knowledge-based approaches typically ignore cross-modal relationships and thus  
25 have limited ability to capture continuous modes of variations shared by different modalities. Data-driven ap-  
26 proaches for identifying IDPs, e.g., variants of unsupervised spatial dimensionality reduction techniques, may  
27 overcome the aforementioned limitations of expert-knowledge-based approaches. For example, independent  
28 component analysis (ICA) and dictionary learning (DicL) have been widely used to define “soft” brain parcel-  
29 lations in resting-state functional MRI analysis (Beckmann and Smith, 2004; Varoquaux et al., 2011). They are  
30 based on arguably objective criteria such as maximising non-Gaussianity or minimising data reconstruction  
31 errors and can, in theory, be applied to a wide variety of different modalities. In a multimodal setting, FMRIB’s  
32 Linked ICA (FLICA) (Groves et al., 2011) is one approach for identifying continuous spatial modes of individ-  
33 ual variations that are related to a range of behavioural phenotypes and diseases (e.g., lifespan development  
34 (Douaud et al., 2014) and attention deficit hyperactivity disorder (Ball et al., 2019)). In our previous work, we  
35 developed BigFLICA, extending the original computationally expensive FLICA to handle larger datasets such  
36 as UK Biobank (Gong et al., 2021). These data-driven approaches have the advantages of being objective and  
37 considering cross-modal relationships, thereby revealing patterns that are ignored by expert-knowledge-based  
38 approaches (Calhoun and Sui, 2016; Uludağ and Roebroeck, 2014).

39 One of the primary applications of extracting imaging features as IDPs is predicting non-imaging derived  
40 phenotypes (nIDPs), including demographic, behavioural, clinical and cognitive measures from individuals.  
41 While the approaches listed above are designed to capture spatial modes of variation from the imaging data  
42 faithfully, they are not explicitly optimised for the latter prediction task. Incorporating the “target” nIDP in-  
43 formation into IDP discovery, therefore, may benefit IDP extraction. Various studies have proposed (semi-  
44 )supervised approaches for IDP discovery, e.g., Qi et al. (2017) developed a multimodal fusion with reference  
45 approach and applied it to find multimodal modes related to schizophrenia (Sui et al., 2018) and major de-  
46 pressive disorder (Qi et al., 2018). Another line of research focused on complex nonlinear approaches, such  
47 as multiple kernel learning (Zhang et al., 2012a; Zhou et al., 2020; Liu et al., 2020), graph-based transductive  
48 learning (Wang et al., 2017) and neural networks such as multilayer perceptrons (Lu et al., 2018; Lee et al.,  
49 2019), which proved successful in predicting neurological disorders such as Alzheimer’s disease. However, two  
50 caveats still exist in the above approaches. First, most of them do not scale well to big datasets due to expensive  
51 computational loads and high memory requirements. Second, nonlinear approaches heavily rely on param-  
52 eter tuning and therefore require additional (cross-)validation for setting appropriate values. Furthermore, it  
53 is often difficult to make meaningful interpretations of the “black-box” nonlinear approaches, as explanations  
54 for deep neural networks produced by existing methods largely remain elusive and are yet to be standardised  
55 (Adadi and Berrada, 2018; Gilpin et al., 2018). As a result, it remains difficult to interpret the neural system that  
56 each feature (or spatial summary statistic) represents.

57 In this paper, to address these issues, we developed ‘Supervised BigFLICA’ (SuperBigFLICA), a semi-supervised,  
58 multimodal, and multi-task fusion approach for IDP discovery, which simultaneously integrates information  
59 from multiple imaging modalities as well as from multiple nIDPs. By incorporating nIDPs in the modelling,  
60 one can hope to achieve better nIDP prediction than by training on the imaging data alone, as this exploits the  
61 covariance structure inherent in the nIDP space in addition to the predictive power of the imaging data. In the  
62 model, we use one or more target nIDPs to help the model learn spatial features that are biologically important  
63 in that they are generically useful in prediction, rather than only taking the route of classical unsupervised ap-  
64 proaches of simply focusing on learning features for representing/reconstructing the image data with minimal  
65 loss. Further, using multiple nIDPs in training - a technique known as multi-task learning (Zhang and Yang,  
66 2017) - one can hope to refine the learned latent space better than when using single nIDPs, which are often  
67 noisy descriptions of the phenotype of interest (e.g., fluid intelligence). Compared with learning to predict each  
68 of the response variables individually, training across a range of noisy but related tasks simultaneously guides  
69 the model to characterise feature space shared across tasks, potentially leading to improved predictive power  
70 of the derived IDPs (Zhang and Yang, 2017; Rahim et al., 2017; Marquand et al., 2014). Additionally, the multi-  
71 task learning frameworks may still be useful even if one is interested in predicting unseen nIDPs (new tasks),  
72 because the latent space learned via a multi-task setting generically is more transferable and thus has higher  
73 predictive power.

74 SuperBigFLICA decomposes the imaging data into common ‘subject modes’ across modalities, which char-  
75 acterise the inter-individual variation of a given underlying spatial component, along with modality-specific  
76 sparse spatial loadings and weightings (Groves et al., 2011; Gong et al., 2021). It minimises a composite loss  
77 function, consisting of both reconstruction errors of the imaging data (‘unsupervised learning’) and the predic-  
78 tion errors of nIDPs (‘supervised learning’), while additionally having constraints pushing for spatially sparse  
79 representations. Further, being built on a Bayesian framework, SuperBigFLICA can automatically balance the  
80 weights of different modalities and nIDPs, thereby aiming to largely bypass the need for parameter tuning.  
81 Optimised by a mini-batch stochastic gradient descent algorithm, SuperBigFLICA is computationally efficient  
82 and scalable to large datasets. In this study, we evaluate the performance of SuperBigFLICA across 39,770 UKB  
83 subjects, using 47 imaging modalities and 17,485 nIDPs. We show that SuperBigFLICA enhances the predic-  
84 tive power of the derived IDPs, benchmarked against those discovered by the conventional expert-knowledge

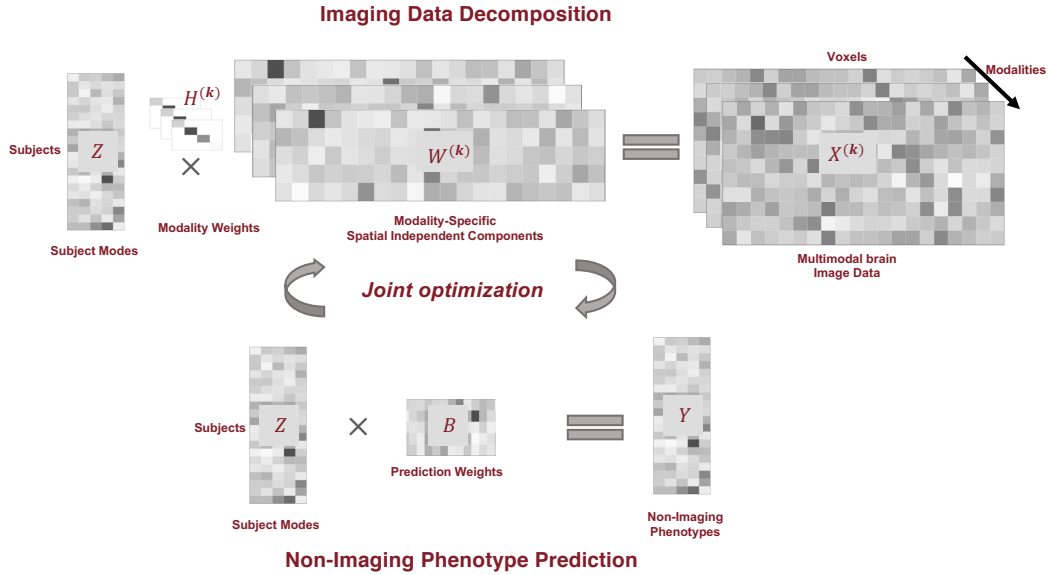

**Figure 1:** Overview of the proposed SuperBigFLICA approach for supervised multimodal fusion and phenotype discovery.

85 and unsupervised-learning approaches. Finally, we provide a comprehensive empirical analysis of the Super-  
 86 BigFLICA algorithm and demonstrate its potential for predicting health outcomes and cognitive nIDPs.

## 87 2. Methods

### 88 2.1. SuperBigFLICA from an optimisation perspective.

89 We assume our data is being derived from a group of  $N$  subjects with multiple imaging modalities. Each  
 90 of these modalities has been processed to produce one or more voxel-wise maps (or network matrices). For  
 91 example, a task fMRI scan may produce several task contrast maps through statistical parametric mapping  
 92 (Penny et al., 2011), and a diffusion MRI analysis can produce maps such as fractional anisotropy (FA) and  
 93 mean diffusivity (MD) per subject. We assume that we have a total of  $K$  modality maps per subject, and each  
 94 modality  $k$  is represented by a matrix  $\mathbf{X}^{(k)}$  of size  $N \times P_k$ , where  $P_k$  is the number of feature values (e.g., voxels,  
 95 tracts, areas, edges or vertices). We also assume that there are  $Q$  nIDPs per subject, summarised in a matrix  $\mathbf{Y}$   
 96 of size  $N \times Q$ . We want to find an  $L$ -dimensional latent space across modalities, optimally predicting multiple  
 97 nIDPs of interests in unseen subjects and representing the original imaging data. This latent space corresponds  
 98 to the weights of continuous spatial modes representing inter-individual variations.

99 Formalising this in terms of a generative model, we will assume each modality map is generated as the  
 100 product of the shared latent space, modality-specific spatial loadings and weights plus some Gaussian residual  
 101 noise:

$$\mathbf{X}^{(k)} = ZH^{(k)}W^{(k)} + E^{(k)}, \quad k = 1, \dots, K \quad (1)$$

102 Meanwhile, the nIDPs of interest are generated by the product of shared latent space and the prediction weights  
 103 plus some Gaussian residual noise:

$$\mathbf{Y} = ZB + E. \quad (2)$$

104 In the above two equations,  $W_{(L \times P_k)}^{(k)}$  are the spatial loadings of the  $k$ -th modality map, which models the im-  
 105 portance of each voxels to each latent dimension;  $H_{(L \times L)}^{(k)}$  is a positive and diagonal modality weighting matrix  
 106 (with  $\sum_{k=1}^K H_{ll}^{(k)} = 1$ ), which reflects, for each component, the overall contribution of each modality; and  $Z_{(N \times L)}$   
 107 is the latent features, i.e., the subject course shared across modalities;  $B$  is an  $L \times Q$  matrix of prediction weights,  
 108 which reflects the contribution of each latent dimension for predicting each nIDP; and finally,  $E^{(k)}$  and  $E$  are  
 109 independent Gaussian random error terms. **Fig. 1** shows an overview of the proposed approach.

110 We have three assumptions for the model. First, the subject loading  $Z_{(N \times L)}$  is generated by:

$$Z = \frac{1}{K} \sum_{k=1}^K Z^{(k)} = \frac{1}{K} \sum_{k=1}^K \mathbf{X}^{(k)} (H^{(k)} W^{(k)})', \quad (3)$$

111 This shared subject loading is a weighted average of subject loadings per modality, in analogy to the original  
 112 FLICA model (Groves et al., 2011). This quantity is useful when we want to estimate the contribution of different  
 113 modalities to the final prediction.

114 Second, the spatial loadings  $W^{(k)}$  are approximately row-wise uncorrelated. We used a reconstruction loss  
115 to achieve this, which has been used in reconstruction independent component analysis (Le et al., 2011):

$$\min_{W,H} \sum_{k=1}^K \| \mathbf{X}^{(k)} - Z(H^{(k)}W^{(k)}) \|_2^2 \quad (4)$$

116 Note that the transpose of  $H^{(k)}W^{(k)}$  in Eq. (3) - due the soft orthogonality constraint for spatial loadings - will  
117 approximate the matrix inverse (Le et al., 2011). For example, when we have a single modality, the loss becomes  
118  $\min_{W,H} \| X - XWHH'W' \|_2^2$ , which means  $WHH'W'$  will approximate the identity matrix. A similar property  
119 holds when we have  $K$  modalities.

120 Third, we assume sparsity in both spatial loadings and prediction weights - this we enforce through  $L_1$   
121 regularisation. The orthogonal and sparsity constraints on spatial loadings will drive the model to find spatial  
122 sparse and non-Gaussian sources, similar to independent component analysis.

123 We combine the above model assumptions by means of the following objective function:

$$\min_{W,H,B} \underbrace{\sum_{k=1}^K (\lambda_1^{(k)} \| \mathbf{X}^{(k)} - Z(H^{(k)}W^{(k)}) \|_2^2 + \lambda_2^{(k)} |W^{(k)}|)}_{\text{data reconstruction loss}} + \underbrace{\sum_{i=1}^Q (\lambda_3^{(i)} \| \mathbf{Y}_i - ZB_i \|_2^2 + \lambda_4^{(i)} |B_i|)}_{\text{nIDP prediction loss}} \quad (5)$$

124 Where  $Y_i$  is the  $i$ -th column of  $Y$ , and  $B_i$  is the  $i$ -th column of  $B$ .

## 125 2.2. SuperBigFLICA in a Bayesian framework.

126 Identification of the relative weighting parameters between the reconstruction loss, the prediction loss and  
127 the sparsity loss (i.e., the  $\lambda$  parameters) through cross-validation is prohibitively expensive. Instead, we take  
128 a Bayesian perspective to tune the parameters. We assume normally distributed residual errors for the re-  
129 construction and prediction terms and place Laplacian priors on the spatial loadings and prediction weights.  
130 Consequently, the  $\lambda$  parameters above will automatically become parameters in the distributions that can be  
131 jointly optimised with other model parameters.

132 For each imaging modality  $\mathbf{X}^{(k)}$ , the probabilistic model for the data reconstruction part is:

$$P(\mathbf{X}^{(k)} | Z, W^{(k)}, H^{(k)}, \sigma^{(k)}) = N(ZH^{(k)}W^{(k)}, (\sigma^{(k)})^2 I) \quad (6)$$

133 Where  $\sigma^{(k)}$  is the modality-specific noise term (where we have assumed the noise is shared across voxels as in  
134 FLICA (Groves et al., 2011)). We place a Laplacian prior on each element of spatial loadings (Park and Casella,  
135 2008):

$$P(W^{(k)} | b^{(k)}) = \frac{1}{2b^{(k)}} \exp\left(-\frac{|W^{(k)}|}{b^{(k)}}\right) \quad (7)$$

136 Further, we place a Gamma prior on each  $x = (\sigma^{(k)})^2$  as  $P(x | \alpha_1, \beta_1) = \frac{\alpha_1^{\beta_1} x^{\alpha_1-1} e^{-\beta_1 x}}{\Gamma(\alpha_1)}$ , and a non-informative  
137 scale-invariant marginal prior on  $x = (b^{(k)})^2$  as  $P(x) = 1/x$ .

138 The probabilistic model for the prediction part is:

$$P(Y_i | Z, B_i, \gamma_i^2) = \mathcal{N}(ZB_i, \gamma_i^2 I), \quad (8)$$

139 where  $\gamma_i$  is a task-specific noise term. We also place a Laplacian prior on prediction weights  $B_i$  (Park and  
140 Casella, 2008):

$$P(B_i | c_i) = \frac{1}{2c_i} \exp\left(-\frac{|B_i|}{c_i}\right), \quad (9)$$

141 and place a Gamma prior on each  $x = (\gamma^{(k)})^2$  as  $P(x | \alpha_2, \beta_2) = \frac{\alpha_2^{\beta_2} x^{\alpha_2-1} e^{-\beta_2 x}}{\Gamma(\alpha_2)}$ , together with a non-informative  
142 scale-invariant marginal prior on  $x = c_i^2$  as  $P(x) = 1/x$ .

143 The posterior distribution of model parameters  $\theta = (W^{(k)}, H^{(k)}, B_i, \sigma^{(k)}, b^{(k)}, \gamma_i, c_i), k = 1, \dots, K, i = 1, \dots, Q$ ,  
144 given the data  $D = (\mathbf{X}^{(1)}, \dots, \mathbf{X}^{(K)}, \mathbf{Y})$  then becomes:

$$\log P(\theta | D) \propto \log P(D | \theta) P(\theta) = \log P(\mathbf{X}^{(1)}, \dots, \mathbf{X}^{(K)} | \theta) P(\mathbf{Y} | Z, \theta) P(\theta) \quad (10)$$

145 Note that the ‘‘auto’’ weights among imaging and nIDPs are proportional to the inverse of the residual predic-  
146 tion variance. But these two types of data usually have completely different properties, so that we don’t want

147 to treat them equally. We therefore add one tuning parameter  $\lambda \in [0, 1]$  to balance the weights between recon-  
 148 struction and prediction losses. Tuning this  $\lambda$  is shown to be useful in different kinds of prediction tasks in our  
 149 experiments later. Thus, we get a modified posterior to be maximized:

$$\begin{aligned} & \lambda \sum_{k=1}^K \left( \log P(\mathbf{X}^{(k)} | \theta) + \log P(\sigma^{(k)}, W^{(k)}, b^{(k)}) \right) + (1 - \lambda) \sum_{i=1}^Q \left( \log P(\mathbf{Y}_i | Z, \theta) + \log P(\gamma_i, B_i, c_i) \right) \\ & = \lambda \underbrace{\sum_{k=1}^K \left[ \left( -\frac{1}{2(\sigma^{(k)})^2} \|\mathbf{X}^{(k)} - ZH^{(k)}W^{(k)}\|_2^2 + (2\alpha_1 - 3) \log(\sigma^{(k)}) - \beta_1(\sigma^{(k)})^2 \right) + \left( -2 \log(b^{(k)}) - \frac{1}{b^{(k)}} |W^{(k)}| \right) \right]}_{\text{data reconstruction loss}} \\ & + (1 - \lambda) \underbrace{\sum_{i=1}^Q \left[ \left( -\frac{1}{2(\gamma_i)^2} \|\mathbf{Y}_i - ZB_i\|_2^2 + (2\alpha_2 - 3) \log(\gamma_i) - \beta_2(\gamma_i)^2 \right) + \left( -2 \log(c_i) - \frac{1}{c_i} |B_i| \right) \right]}_{\text{nIDP prediction loss}} + \text{const} \end{aligned} \quad (11)$$

150 We can appreciate from Eq. (11) that, the  $\lambda$ s in Eq. (5) have been replaced by learnable parameters in the prior  
 151 distribution of spatial weights and prediction weights (e.g., Gaussian and Laplacian priors), and these learn-  
 152 able parameters have their priors (i.e., Gamma or non-informative priors). The weights among modalities and  
 153 nIDPs are proportional to the inverse of the residual prediction variance. This is analogous to a Bayesian linear  
 154 regression with unknown residual variance (Bishop, 2006). The motivation is that the tasks (e.g., prediction  
 155 or reconstruction) with larger error/uncertainty will be given lower weights (Kendall et al., 2018). We can also  
 156 replace the Laplacian prior with other sparsity priors to achieve an equivalent sparsity effect. Such alternative  
 157 priors include the automatic relevance determination (ARD) prior (Wipf and Nagarajan, 2008), the spike-and-  
 158 slab prior (Mitchell and Beauchamp, 1988), and the Gaussian mixture model prior (used in our original FLICA  
 159 work (Groves et al., 2011)).

160 We may later be interested in the contribution of a modality within a latent component to prediction of a  
 161 specific nIDP. This can be estimated by the correlation between a column of  $Z^{(k)}$  in Eq. (3) and an nIDP. This  
 162 is because  $Z^{(k)}$  is the subject course generated by the  $k$ -th modality, which has been used to predict an nIDP  
 163 linearly.

### 164 2.3. Model parameter optimization.

165 The SuperBigFLICA model is implemented using Pytorch which can be easily run on a CPU and can be  
 166 adapted to GPU usage for a more efficient model training. We obtain the maximum-a-posterior (MAP) solu-  
 167 tion of all parameters using a standard mini-batch stochastic gradient-descent (SGD) algorithms. Here, we  
 168 have used the Adam optimizer (Kingma and Ba, 2014) for parameters  $W^{(k)}, H^{(k)}, B_i$ , and the RMSprop opti-  
 169 mizer (Tejedor and Hinton, 2012) for parameters  $\sigma^{(k)}, b^{(k)}, \gamma_i, c_i$ , owing to empirical performance. The first  
 170 order gradient-based algorithms were used because of their computational efficiency and low memory require-  
 171 ment suitable for optimising high-dimensional parameter space. Below, we evaluate the proposed combined  
 172 optimisers with other standard first-order methods such as SGD with momentum (Sutskever et al., 2013), Adam  
 173 or RMSprop, and a quasi-Newton methods L-BFGS (Liu and Nocedal, 1989). We fixed the mini-batch size to  
 174 512 subjects and chose the optimal learning rate from 0.0001, 0.001, 0.01, and the tuning parameters  $\lambda$  from  
 175  $1E-5$  to 0.99999. Dropout regularization with  $p = 0.2$  is used on input modalities  $X^{(k)}$  and subject loading  $Z$   
 176 to decrease the chance of overfitting (Srivastava et al., 2014). Batch normalisation is used on  $Z$  in the training  
 177 stage (Ioffe and Szegedy, 2015). The total number of epochs (number of times the full data passes through  
 178 the model) is 50, the learning rate decreases by 1/2 every ten epochs. The model weights are initialised by  
 179 Gaussian-distributed random numbers of mean 0 and variance 1.

## 180 3. Experiments

### 181 3.1. Brain imaging data.

182 Voxel-wise neuroimaging data of 47 modalities from 39,770 subjects were used in this paper, including:  
 183 (1) 25 “modalities” from the resting-state fMRI ICA dual-regression spatial maps after  $Z$ -score normalisation  
 184 (Miller et al., 2016); (2) 6 modalities from the emotion task fMRI experiment: 3 contrast (shapes, faces, faces>shapes)  
 185 of  $Z$ -statistics and 3 contrasts of parameter estimate maps (Miller et al., 2016) that reflect %BOLD signal change;  
 186 (3) 10 diffusion MRI derived modalities (9 TBSS features, including FA, MD, MO, L1, L2, L3, OD, ICVF, ISOVF  
 187 (Smith et al., 2006; Zhang et al., 2012b) and a summed tractography map of 27 tracts from AutoPtx in FSL  
 188 (De Groot et al., 2013)); (4) 4 T1-MRI derived modalities (grey matter volume and Jacobian deformation map  
 189 (which shows expansion/contraction generated by the nonlinear warp to standard space, and hence reflects  
 190 local volume) in the volumetric space, and cortical area and thickness in the Freesurfer’s fsaverage surface  
 191 space; (5) 1 susceptibility-weighted MRI map (T2-star); (6) 1 T2-FLAIR MRI derived modality (white matter  
 192 hyperintensity map estimated by BIANCA (Griffanti et al., 2016)). The UK Biobank imaging data were mainly

**Table 1:** Non-imaging derived phenotypes used in this study.

| Non-imaging derived phenotypes                                     |
|--------------------------------------------------------------------|
| Fluid intelligence                                                 |
| Hypertension                                                       |
| Handedness                                                         |
| Treatment/medication code (1140884600 - metformin)                 |
| Diabetes diagnosed by doctor                                       |
| Non-cancer illness code, self-reported (1261 - multiple sclerosis) |
| Overall health rating                                              |
| Age started wearing glasses or contact lenses                      |
| Number of treatments/medications taken                             |
| Mean time to correctly identify matches                            |
| Maximum digits remembered correctly                                |
| Number of self-reported non-cancer illnesses                       |

193 preprocessed by FSL (Smith et al., 2004; Jenkinson et al., 2012) and FreeSurfer (Fischl, 2012) following an opti-  
194 mized processing pipeline(Alfaro-Almagro et al., 2018) (<https://www.fmrib.ox.ac.uk/ukbiobank/>). From  
195 the voxel-wise modality maps, we generate 3,913 IDPs, including global and local features from the six imaging  
196 modalities (T1, T2-FLAIR, swMRI, task fMRI, resting-state fMRI, and diffusion MRI) (Smith et al., 2020) further  
197 specified in the **supplementary file**.

### 198 3.2. *Non-imaging derived phenotypes.*

199 A total of 17,485 non-imaging derived phenotypes (nIDPs) were used in this paper. We mainly analyzed  
200 12 of them in the ‘physical’, ‘cognition’, and ‘health outcome’ domains, summarised in **Table 1**. These nIDPs  
201 were selected to allow for a direct comparison to our previous work, as they were the best predicted nIDPs in  
202 cognition and health outcome domains by our baseline approach BigFLICA (Gong et al., 2021). The direct com-  
203 parison of performance between SuperBigFLICA and BigFLICA approaches enables us to study the benefits of  
204 including the supervised loss terms.

### 205 3.3. *Confounding variables and missing values.*

206 Before carrying out nIDP prediction, a total of 597 confounding variables were regressed out from both  
207 voxelwise imaging data and nIDPs, using linear regression (Alfaro-Almagro et al., 2021). Missing modality data  
208 for a subject were imputed by the mean map of all other subjects. We did not impute missing nIDPs, and  
209 therefore, in the SuperBigFLICA model, only data-reconstruction-related losses play a role for subjects with  
210 missing nIDP data.

### 211 3.4. *Imaging data pre-reduction using dictionary learning.*

212 There are tens of thousands of voxels per modality, so a direct fitting of SuperBigFLICA using voxel-level  
213 data is computationally expensive and memory-consuming. Although we can perform mini-batch optimi-  
214 sation on the subjects, we need to keep  $K$  big voxel-by-component spatial maps as learnable parameters in  
215 memory. One possible solution is to use sparse dictionary learning for voxel space dimension reduction before  
216 running SuperBigFLICA. As shown in our previous work (Gong et al., 2021), for BigFLICA, sparse dictionary  
217 learning will reduce the computation load of the optimisation and may increase the modality-specific signal-  
218 to-noise ratio. This is because the overall model is linear, so that a pre-dimension reduction using a (linear)  
219 dictionary learning should not interfere with important information that can be captured by BigFLICA, but will  
220 potentially have the de-noising effect. Owing to the similar property of the models employed in BigFLICA and  
221 SuperBigFLICA, we expect sparse dictionary learning to perform similarly well. Here, we evaluate the effect  
222 of data reduction on the final prediction across the voxel-domain between 100 and 2,000 dictionary features  
223 per modality before running any subsequent algorithm, e.g., BigFLICA or SuperBigFLICA. Note that this pre-  
224 reduction can also be performed with nIDP information included. We therefore also tested applying a “single-  
225 modality” SuperBigFLICA to each single modality map (which is just a special case with  $K = 1$ ) with all 17,485  
226 nIDPs as supervision before using SuperBigFLICA for multimodal analysis.

### 227 3.5. *Baseline: nIDP prediction using hand-curated IDPs and modes of BigFLICA.*

228 In real data, we rely on the performance of predicting nIDPs as a surrogate criterion to evaluate different  
229 methods, given that “ground-truth” IDPs do not in general exist. As a baseline approach, we compare hand-  
230 curated IDPs and modes of BigFLICA. The pipeline for prediction follows our previous work (Gong et al., 2021).  
231 In brief, 3,913 IDPs and 1,000 modes of BigFLICA are extracted from UK Biobank imaging data. BigFLICA used  
232 a 3,500-dimensional MIGP approach (Gong et al., 2021) and a 2,000-dimensional dictionary learning approach  
233 as data preprocessing (Gong et al., 2021) before running the core FLICA variational Bayesian optimization.

234 Here, a high dimensional decomposition was chosen as in our previous work on BigFLICA, which achieved  
235 the best prediction accuracy for most nIDPs (Gong et al., 2021). Further, elastic-net regression, from the `glmnet`  
236 package (Zou and Hastie, 2005), was used to predict each of the 12 nIDPs separately (known as single-task  
237 learning) using IDPs or FLICA subject modes as model regressors (features). This approach is widely used and  
238 has been shown to achieve robust and state-of-the-art performance in many neuroimaging studies (Cui and  
239 Gong, 2018; Jollans et al., 2019).

240 We randomly selected a subset of 25,000 subjects for model training, while the validation set contains 5,000  
241 different subjects, and the test set was formed from the remaining 9,770 subjects. All methods' comparisons are  
242 using the same train-test split. For single-task learning, the prediction accuracy was quantified as the Pearson  
243 correlation between predicted and the true values of each nIDP in the test sets. For multi-task learning, the  
244 prediction accuracy was quantified as the sum of correlations with nIDPs larger than 0.1.

### 245 3.6. Predicting nIDPs using single-task and multi-task SuperBigFLICA.

246 In order to demonstrate how SuperBigFLICA with one or more target nIDPs in training can boost the per-  
247 formance compared to hand-curated IDPs and unsupervised BigFLICA, first, we trained single-task Super-  
248 BigFLICA with each of the 12 nIDPs as a supervision target. We then trained multi-task SuperBigFLICA by  
249 including each target and the top 24 or 99 most highly correlated (with the target) nIDPs from all 17,485 avail-  
250 able nIDPs from the UK Biobank dataset, in the training stage. In previous work, it was already established  
251 that the inclusion of correlated tasks as targets could boost the performance of single-task learning (Zhang and  
252 Yang, 2017; Rahim et al., 2017). Therefore, we performed 25- or 100-dimensional multi-task learning (sepa-  
253 rately) for each of the 12 nIDPs and evaluated the prediction performance. Note that while an additional 24 (or  
254 99) nIDPs (that are correlated to the target nIDP) are used to help in the training, they are not used in test data  
255 to help the prediction - only the imaging data from test subjects is used in predictions of nIDPs in test subjects.  
256 Finally, we trained SuperBigFLICA with all 17,485 nIDPs as supervision targets. For the tuning parameters, the  
257 number of latent components was chosen to be 25, 100, 250, 500, or 1,000, and the  $\lambda$  parameter is chosen from  
258  $1E-5$  to 0.99999. We evaluated the influence of  $\lambda$ , and different random model parameter initialisations on  
259 the final prediction performance.

### 260 3.7. Evaluation of the generalisability of SuperBigFLICA modes on unseen nIDPs.

261 One of the fundamental goals of phenotype discovery is to learn a low-dimensional latent space that is  
262 generalisable in that it can predict “unseen” nIDPs. In the above analyses, the nIDP to be predicted was always  
263 included in the training stage. Here, we evaluated whether SuperBigFLICA can generate a good representation  
264 for entirely new tasks, wherein in the training stage, we only use nIDPs that are not our targets. To do this,  
265 for a given nIDP that we want to predict (e.g., fluid intelligence), we first compute the correlations between  
266 this target nIDP and all other 17,485 nIDPs. We selectively include the 16,485 least correlated nIDPs for training  
267 SuperBigFLICA, ignoring the 1,000 most strongly covarying nIDPs in training. This means that, for example, the  
268 mean correlation of 16,485 nIDPs with the target variable fluid intelligence is 0.007, and nIDPs with correlation  
269  $> 0.032$  with fluid intelligence are removed in training. This experiment simulates a “bad” situation where  
270 almost no nIDPs are related to our target when generating the latent space. We then used elastic-net regression  
271 to predict our target nIDP using the resulting latent space, in order to evaluate the degree to which the inclusion  
272 of unrelated nIDPs constrains the learning towards IDP features that are more generally useful for prediction  
273 across a wide range of nIDPs, and thereby ultimately also improves prediction for specific nIDPs of interest.  
274 This may also relate to the concept of transfer learning, where we can use multiple nIDPs to learn a space that  
275 generically has high predictive power.

## 276 4. Results

### 277 4.1. Comparing SuperBigFLICA with hand-curated IDPs and modes of unsupervised BigFLICA.

278 We first compared SuperBigFLICA with hand-curated IDPs and BigFLICA, and then compared different  
279 variants of SuperBigFLICA, in terms of prediction accuracy of nIDPs (Method sections 3.5, 3.6 and 3.7). Each  
280 subfigure of Fig. 2 shows the overall prediction accuracy of different experimental approaches for 12 nIDPs. We  
281 report the results that use the dictionary dimension of 250 for each modality (detailed in the next section). The  
282 test accuracy is obtained using the best tuning parameters ( $\lambda$  and number of latent components) selected in  
283 the validation set.

284 The first two columns are the accuracy of elastic-net regression with hand-curated IDPs and modes of un-  
285 supervised BigFLICA as input features, while the third column is the accuracy of single-task SuperBigFLICA  
286 trained end-to-end. We can see that in almost all cases, the accuracy of semi-supervised training outper-  
287 forms hand-curated IDPs and unsupervised BigFLICA. The average percent improvement of single-task Su-  
288 perBigFLICA compared with hand-curated IDPs and BigFLICA are 46% and 25%.

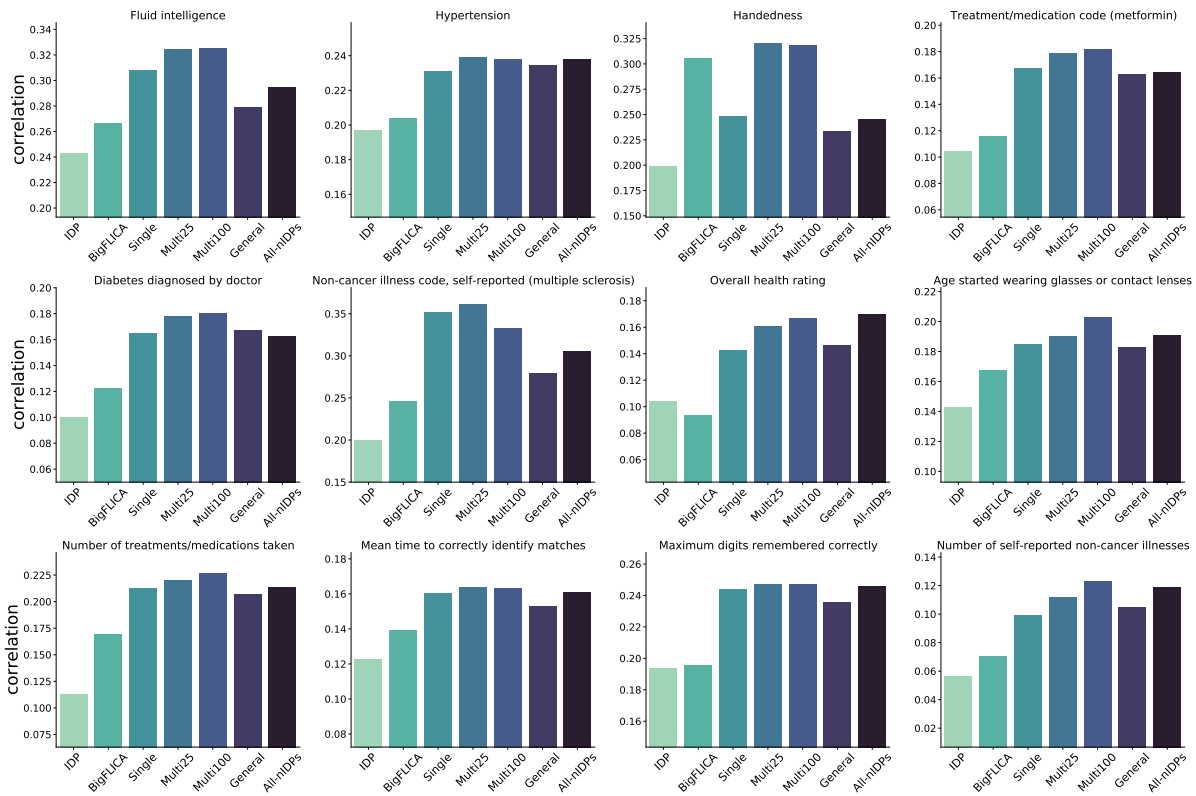

**Figure 2: Comparison of SuperBigFLICA with hand-curated IDPs and modes of unsupervised BigFLICA for the 12 nIDPs listed in Table 1.** Each figure shows - for a different nIDP - the predictive correlation of different approaches and different parameter settings. The first and second column shows the 'baseline' prediction accuracy of IDPs and BigFLICA. The third column shows the accuracy of single-task SuperBigFLICA trained end-to-end. The fourth and fifth columns show prediction accuracy of multi-task SuperBigFLICA, with 24 and 99 most correlated nIDPs as auxiliary tasks for supporting the training of the main nIDP of interest. The sixth column shows the generalisability accuracy of SuperBigFLICA modes on unseen nIDPs, where the main nIDP of interest is not included in the learning of latent space but only 16485 nIDPs that are least correlated with it. The seventh column shows the prediction accuracy when we fuse all 47 modalities and use all 17,485 nIDPs to train a single model.

289 The fourth and fifth columns of each subfigure of **Fig.2** show prediction accuracy of multi-task Super-  
 290 BigFLICA, with 24 and 99 most correlated nIDPs as auxiliary tasks for supporting the training of the main nIDP  
 291 of interests. We can see that multi-task learning usually further improves the prediction accuracy compared  
 292 with single-task SuperBigFLICA. The average per cent improvement of two multi-task BigFLICA compared with  
 293 single-task SuperBigFLICA are 9% and 7%.

294 The sixth column of each subfigure of **Fig.2** shows the generalisability of SuperBigFLICA modes on unseen  
 295 nIDPs, where the main nIDP of interests is not included in learning the latent space (only nIDPs that are at best  
 296 weakly correlated with the main nIDP of interests are involved). We then used elastic-net regression to predict  
 297 the main nIDP based on the learned latent space as regressors. Overall, this is expected to perform worse than  
 298 single-task and multi-task SuperBigFLICA because the target nIDP is not involved in the training. However, it  
 299 still outperforms unsupervised BigFLICA plus elastic-net by 21%, and is slightly worse than single-task Super-  
 300 BigFLICA. This experiment demonstrated that the inclusion of even irrelevant tasks in the "supervised" training  
 301 could boost the predictive performance of the generated latent space.

302 The seventh column of each subfigure of **Fig.2** shows the prediction accuracy when we fuse all 47 modalities  
 303 and 17,485 nIDPs to train one multi-task SuperBigFLICA model. We can see that the prediction accuracy is  
 304 similar to single-task SuperBigFLICA for most of the nIDPs.

## 305 4.2. Analysis of SuperBigFLICA algorithm.

### 306 4.2.1. Relationship between prediction accuracy and hyper-parameters.

307 We evaluated the influence of the relative weighting between reconstruction loss and prediction loss, i.e.,  
 308  $\lambda$ , and the number of latent components, on the final prediction performance. **Fig.3A** shows the mean pre-  
 309 diction correlation of 12 nIDPs listed in **Table 1** across different  $\lambda$  and latent components using single-task  
 310 SuperBigFLICA. When the latent dimension is small, we need to choose a small  $\lambda$  (i.e.,  $\lambda < 0.5$ , which means  
 311 that the prediction loss has a higher weight than the reconstruction loss) to achieve optimal prediction. When



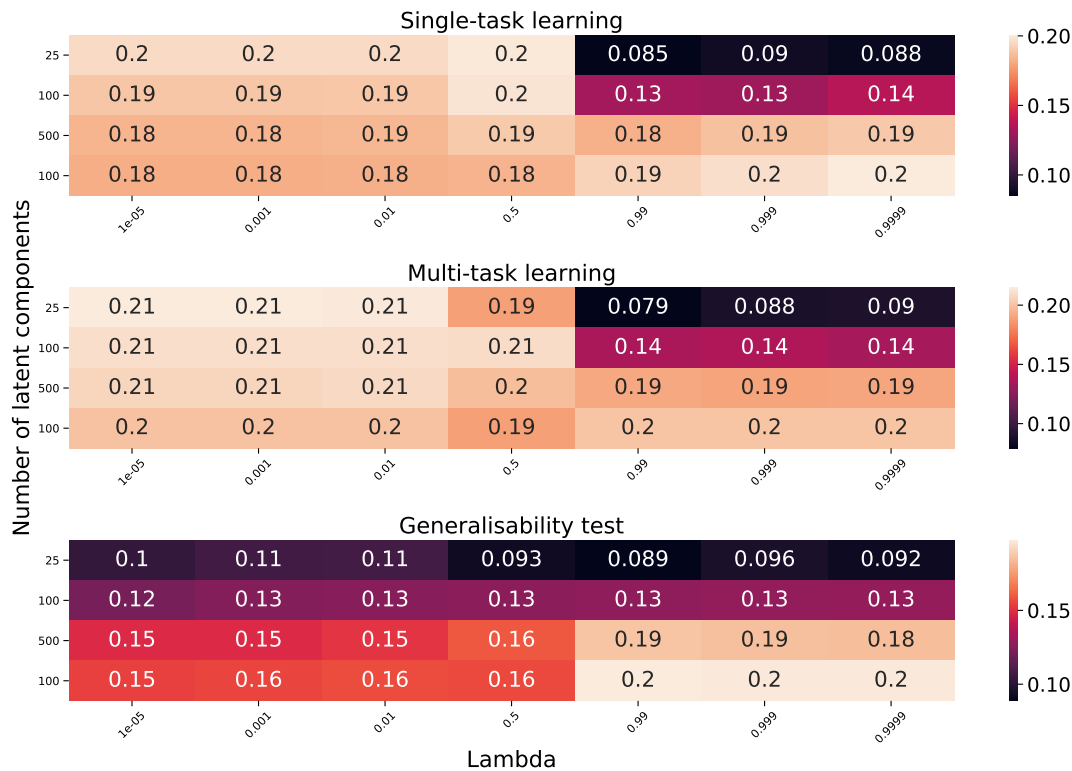

**Figure 3: The relationship between the number of latent dimensions (y-axis) and weights between reconstruction and prediction losses (x-axis) with the mean prediction accuracy across 12 nIDPs listed in Table 1. A. Single-task learning setting. B. Multi-task learning setting with 24 auxiliary tasks. C. generalisability test.**

312 the latent dimension is large, although a smaller  $\lambda$  also achieves the best prediction accuracy, the influence of  
 313  $\lambda$  becomes much smaller than using a smaller latent dimension. We can draw a similar conclusion from the re-  
 314 sults shown in Fig.3B, which is the case of multi-task SuperBigFLICA with 24 most correlated nIDPs as auxiliary  
 315 tasks. Conversely, for the generalisability test, Fig.3C shows that the prediction accuracy is low when the latent  
 316 dimension is small. When the latent dimension is large, the prediction accuracy is highest when  $\lambda > 0.5$ , i.e.,  
 317 the reconstruction loss has higher weight than the prediction loss. This analysis guides how to select hyper-  
 318 parameters in different circumstances and demonstrates the usefulness of including both data reconstruction  
 319 and prediction losses in the objective function.

#### 320 4.2.2. Influence of imaging space dimension reduction on prediction accuracy.

321 We first tested whether the imaging space pre-dimension reduction with dictionary learning influenced  
 322 the final prediction accuracy of nIDPs (Method section 3.4). Fig.4A shows that, for different nIDPs, the average  
 323 accuracy of single-task SuperBigFLICA is similar ( $0.18 < r < 0.22$ ) across different dictionary dimensions. The  
 324 250-dimensional dictionary learning achieves slightly better performance.

325 We further evaluated the use of SuperBigFLICA to perform imaging space dimension “pre-reduction” (250-  
 326 dimension for each modality, the same with dictionary learning), with all 17,485 nIDPs as supervised targets.  
 327 We did not see an improvement relative to using dictionary learning, e.g., for fluid intelligence, the best predic-  
 328 tion correlation is only around  $r = 0.20$ , much lower than the result achieved by dictionary learning  $r = 0.33$ . A  
 329 lower prediction correlation was also observed for other nIDPs and other SuperBigFLICA dimensions. A possi-  
 330 ble reason is that using all nIDPs in the pre-dimension reduction stage discards information in the imaging data  
 331 related to the target nIDP. Also, we find that using SuperBigFLICA in this situation is more memory intensive be-  
 332 cause we need to keep a huge voxel-by-component spatial weight matrix in memory. In contrast, in dictionary  
 333 learning, we only need to keep a smaller subject-by-component matrix in memory because it performs a mini-  
 334 batch optimisation on the voxel dimension. Finally, another disadvantage of the two-stage supervised learning  
 335 strategy is the need for two nested cross-validation loops for parameter selection, significantly increasing the  
 336 computation cost.

#### 337 4.2.3. Influence of parameter initialisation on the prediction accuracy.

338 We evaluated the influence of random model parameter initialisations on the final prediction accuracy. We  
 339 tested whether two different random initialisations will result in different accuracy. Therefore, we performed

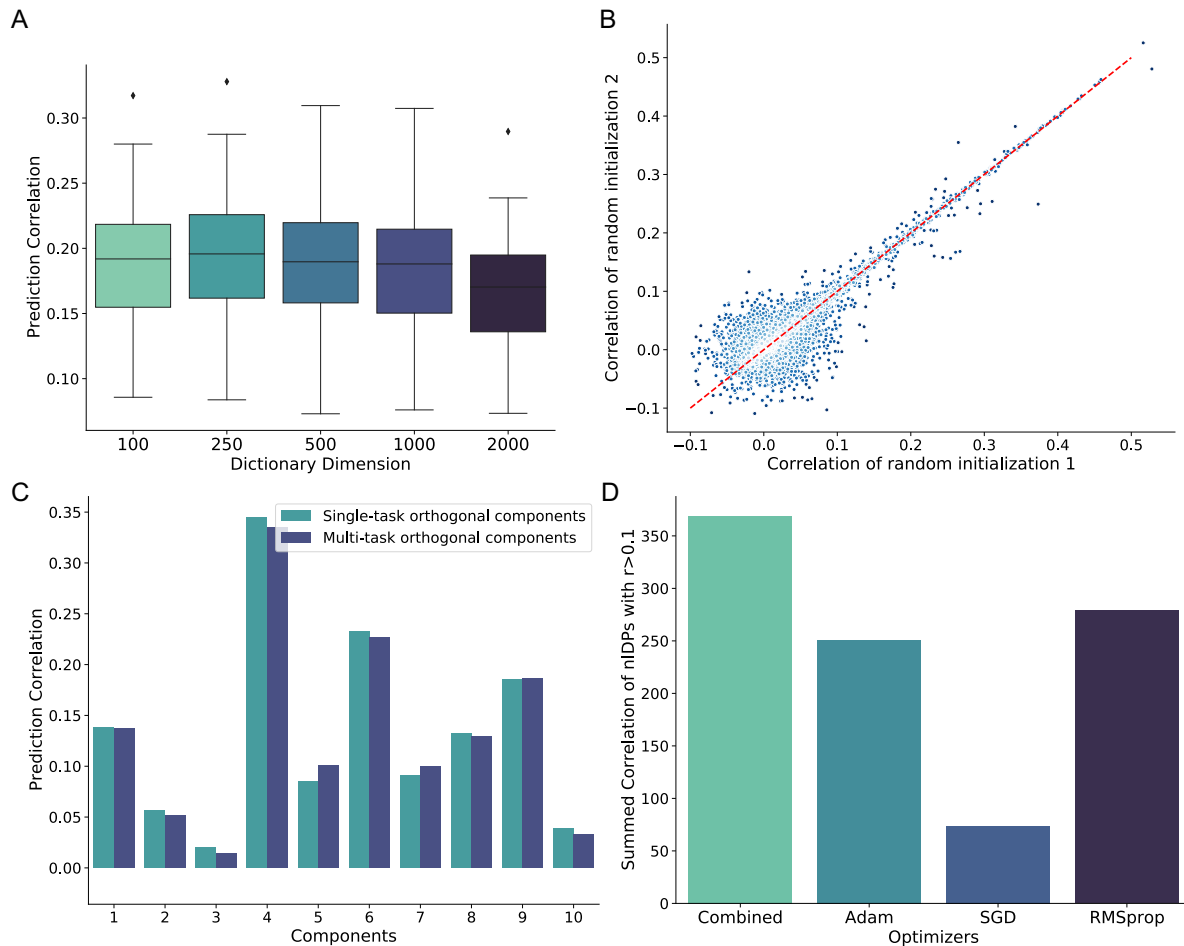

**Figure 4: Evaluations of SuperBigFLICA model.** **A.** The average prediction accuracy of 12 nIDPs using different dictionary learning dimensions in the image data pre-reduction stage. **B.** The prediction accuracy of 17,485 nIDPs as a result of different random parameter initializations. **C.** Comparing the prediction accuracy of single-task SuperBigFLICA vs. multi-task SuperBigFLICA for predicting top 10 orthogonal principal components derived from all nIDPs. **D.** Comparing the prediction accuracy of all 17,485 nIDPs of SuperBigFLICA optimized by different numerical optimizers.

340 two multi-task SuperBigFLICA experiments with all 17,485 nIDPs as targets. The only difference between these  
 341 two experiments is the different seeds for parameter initialisation. **Fig.4B** shows the scatter plots of prediction  
 342 correlations of the different nIDPs from two different initialisations. We can see that nIDP correlations  $< 0.1$   
 343 result in a roughly spherical point cloud, while correlations  $> 0.1$  are highly correlated, i.e., different initialisa-  
 344 tions lead to similar nIDP predictions.

#### 345 4.2.4. Influence of nIDP task covariance structure on the prediction accuracy.

346 We further evaluated whether the increases in prediction accuracy of multi-task learning compared with  
 347 single-task learning result from incorporating information about the task covariance structure into the estima-  
 348 tion. We tested this hypothesis by predicting uncorrelated (orthogonal) nIDPs either using separate single-task  
 349 SuperBigFLICA or jointly using multi-task SuperBigFLICA. To obtain these orthogonal nIDPs, we extracted the  
 350 top 10 principal components from the subject-by-nIDP data matrix. We compared the accuracy when the  
 351 model predicted them separately as single-task learning and jointly as multi-task learning. The result shows  
 352 that the performance is almost the same for each of the 10 “orthogonal” tasks (**Fig.4C**). This experiment shows  
 353 that the covariance structure between the different nIDPs enables the multi-task model to improve over and  
 354 above the single-task model.

#### 355 4.2.5. Influence of optimisation algorithms on the prediction accuracy.

356 We finally evaluated the choice of numerical optimisation algorithms on the prediction accuracy. We took  
 357 an example where we used SuperBigFLICA to fuse all 47 modalities and 17,485 nIDPs to discover a 1,000-  
 358 dimensional latent space. The Adam, SGD, and RMSprop optimisers all perform worse than the combined  
 359 optimisation algorithm in terms of the overall prediction accuracy of the 17,485 IDPs (**Fig.4D**). The overall ac-  
 360 curacy is estimated by the sum of correlation of nIDPs larger than 0.1.



gyrus, and frontal pole (Amodio and Frith, 2006). Among them, the insular cortex, inferior frontal gyrus, and frontal pole were found significant in task modalities in our previous BigFLICA approach (Gong et al., 2021), but with a much higher 750-dimensional decomposition. This reflects the fact that adding supervision to the model can help the model learn task-specific patterns easier. In addition, here, with the SuperBigFLICA approach, we can observe a more comprehensive ‘multimodal’ effect, such as the changes in cortical surface area and thickness in these regions, and changes of tracts and white matter microstructures that connect these regions, which are also reported in literature (Menary et al., 2013; Chen et al., 2020). Moreover, we also observe the precuneus cortex and posterior cingulate gyrus in several resting-state maps, as part of the default mode network, involved in fluid intelligence prediction (Santarnecchi et al., 2017).

#### 4.3.2. Phenotype discovery using a high-dimensional SuperBigFLICA.

We finally applied SuperBigFLICA to perform a 1,000-dimensional decomposition with all 17,485 nIDPs as supervision targets. This 1,000-dimensional latent space can serve as a set of new data-driven IDPs.

Fig. A.6 shows the  $Z$ -score normalised spatial maps of the component that most strongly contributes to the prediction of *hypertension* scores. The prediction correlation is 0.24. The regions that show the highest contribution to the prediction of hypertension are mainly located in the precuneous cortex, visual cortex, middle temporal gyrus, central opercular cortex, Heschel’s gyrus, inferior frontal gyrus and insular cortex, and also external capsule tracts. Again, the modes are more ‘multimodal’, and several consistent findings have been reported in the literature (Li et al., 2015; Den Heijer et al., 2005; Hannawi et al., 2018).

Likewise, Fig. A.7 shows the  $Z$ -score normalised spatial maps of the mode that contributes most strongly to the prediction of *age started wearing glasses or contact lenses*. The prediction correlation is 0.19. The regions that show the highest contribution to the prediction of hypertension are mainly located in visual areas, especially for resting-state dual regression spatial maps 5, which represents the visual network.

## 5. Discussion

In this paper, we propose SuperBigFLICA, a semi-supervised multimodal data fusion approach that simultaneously reconstructs the original voxel-wise imaging data and best predicts non-imaging derived phenotypes. The approach is scalable to extreme high-dimensional data sets, e.g., UK Biobank scale neuroimaging datasets. SuperBigFLICA inherits the Bayesian framework from the previous FLICA model (Groves et al., 2011; Gong et al., 2021). Additionally, it incorporates an additional prediction term to enable supervised learning of the target variable of interests (i.e., multiple nIDPs). SuperBigFLICA can discover spatially sparse and orthogonal modes that can serve as generic data-driven IDPs for future prediction of new nIDPs. The weighting of different modalities and nIDPs can be automatically inferred from the data, avoiding manual specification.

Compared to previous linear approaches (e.g., (Qi et al., 2017)), the scalability of our approach to huge data sets is improved through the use of advanced stochastic optimisation algorithms. Our model can use multiple nIDPs as supervision targets and can predict unseen nIDPs. Compared to nonlinear approaches (e.g., (Zhang et al., 2012a; Zhou et al., 2020; Liu et al., 2020)), our approach can explicitly discover a low-dimensional linear latent space as new image-derived phenotypes. We performed a comprehensive comparison of SuperBigFLICA with the hand-curated IDPs currently being created by our group on behalf of UK Biobank, and modes of unsupervised BigFLICA, and found a significantly improved performance on predicting nIDPs. We also showed that by using the multi-task learning paradigm, SuperBigFLICA showed a further improvement than its single-task setting. We demonstrated SuperBigFLICA’s performance in learning a generalisable latent space by applying it to predict unseen nIDPs. These tests were performed using the largest neuroimaging dataset to date (UK Biobank), with 47 different modalities, 39,770 subjects, and 17,485 nIDPs, which illustrates the ability of SuperBigFLICA for analysing large-scale datasets. In real data examples, we demonstrated that SuperBigFLICA finds interpretable modes predictive of health outcome and cognitive nIDPs.

There are multiple future directions for improving the current approach. First, we could further explore the possibility of improving prediction of unseen nIDPs by using advanced techniques in transfer learning (Pan and Yang, 2009). Second, a deeper understanding of the latent space, including the interpretation of spatial maps and the influence of dimensionality of latent space with prediction power, could be interesting. Third, another straightforward extension would be adding nonlinearity to SuperBigFLICA, which enables it to extract more complex nonlinear patterns from brain imaging data, with or without the supervision of nIDPs. Many options exist to achieve this by using either deep neural networks (Goodfellow et al., 2016) or traditional machine learning approaches such as Gaussian process latent variable model (Lawrence, 2005) and multiple kernel learning (Gönen and Alpaydm, 2011). Nonlinear approaches such as deep convolutional neural networks have shown excellent age and sex prediction accuracy using structural MRI data (Peng et al., 2019) and in Alzheimer disease progression (Nguyen et al., 2020), but the usefulness of nonlinear models for neuroimaging data is still under debate (Schulz et al., 2020; He et al., 2020; Abrol et al., 2020) due to the increased complexity of evaluating and interpreting their performance. Therefore, besides developing a nonlinear model for improving predictive performance, deriving interpretable nonlinear features is also an important task.

437 In summary, all of the above will be explored in future improvements to our analysis approach. An easy-  
438 to-use version of this software will be integrated into an upcoming version of the FSL software package (Smith  
439 et al., 2004; Jenkinson et al., 2012). Results from applying SuperBigFLICA on UK Biobank will also be released  
440 via the UKB database as new data-driven IDPs (image features), further contributing to the richness of the  
441 sample and enabling neuroscientific research.

#### 442 **Acknowledgments.**

443 We are grateful to UK Biobank and its participants (access application 8107). We would like to thank Dr.  
444 Alberto Llera for providing the code of the original FLICA algorithm. Computation used the Oxford Biomedical  
445 Research Computing (BMRC) facility, a joint development between the Wellcome Centre for Human Genetics  
446 and the Big Data Institute supported by Health Data Research UK and the NIHR Oxford Biomedical Research  
447 Centre. Financial support was provided by the Wellcome Trust Core Award Grant Number 203141/Z/16/Z.

#### 448 **Competing interests.**

449 The authors declare that they have no competing financial interests.

#### 450 **Data availability.**

451 For UK Biobank, all source data (including raw and processed brain imaging data, derived IDPs, and non-  
452 imaging measures) is available from UK Biobank via their standard data access procedure (see [http://www.  
453 ukbiobank.ac.uk/register-apply](http://www.ukbiobank.ac.uk/register-apply)).

#### 454 **Code availability.**

455 SuperBigFLICA code is available at <https://github.com/weikanggong/SuperBigFLICA>, and will also  
456 be released as part of an upcoming version of FSL.

## 457 References

- 458 Abrol, A., Fu, Z., Salman, M., Silva, R., Du, Y., Plis, S., and Calhoun, V. (2020). Hype versus hope: Deep learning encodes more predictive  
459 and robust brain imaging representations than standard machine learning. *bioRxiv*.
- 460 Adadi, A. and Berrada, M. (2018). Peeking inside the black-box: a survey on explainable artificial intelligence (xai). *IEEE access*, 6:52138–  
461 52160.
- 462 Alfaro-Almagro, F., Jenkinson, M., Bangarter, N. K., Andersson, J. L., Griffanti, L., Douaud, G., Sotiropoulos, S. N., Jbabdi, S., Hernandez-  
463 Fernandez, M., Vallee, E., et al. (2018). Image processing and quality control for the first 10,000 brain imaging datasets from UK Biobank.  
464 *Neuroimage*, 166:400–424.
- 465 Alfaro-Almagro, F., McCarthy, P., Afyouni, S., Andersson, J. L., Bastiani, M., Miller, K. L., Nichols, T. E., and Smith, S. M. (2021). Confound  
466 modelling in uk biobank brain imaging. *NeuroImage*, 224:117002.
- 467 Amodio, D. M. and Frith, C. D. (2006). Meeting of minds: the medial frontal cortex and social cognition. *Nature reviews neuroscience*,  
468 7(4):268–277.
- 469 Ball, G., Malpas, C. B., Genc, S., Efron, D., Sciberras, E., Anderson, V., Nicholson, J. M., and Silk, T. J. (2019). Multimodal structural neu-  
470 roimaging markers of brain development and adhd symptoms. *American Journal of Psychiatry*, 176(1):57–66.
- 471 Beckmann, C. F. and Smith, S. M. (2004). Probabilistic independent component analysis for functional magnetic resonance imaging. *IEEE*  
472 *transactions on medical imaging*, 23(2):137–152.
- 473 Bishop, C. M. (2006). Pattern recognition and machine learning. *Journal of Electronic Imaging*, 16:049901.
- 474 Calhoun, V. D. and Sui, J. (2016). Multimodal fusion of brain imaging data: a key to finding the missing link (s) in complex mental illness.  
475 *Biological psychiatry: cognitive neuroscience and neuroimaging*, 1(3):230–244.
- 476 Chen, P.-Y., Chen, C.-L., Hsu, Y.-C., Tseng, W.-Y. I., et al. (2020). Fluid intelligence is associated with cortical volume and white matter tract  
477 integrity within multiple-demand system across adult lifespan. *NeuroImage*, 212:116576.
- 478 Cui, Z. and Gong, G. (2018). The effect of machine learning regression algorithms and sample size on individualized behavioral prediction  
479 with functional connectivity features. *Neuroimage*, 178:622–637.
- 480 Dadi, K., Varoquaux, G., Machlouzarides-Shalit, A., Gorgolewski, K. J., Wassermann, D., Thirion, B., and Mensch, A. (2020). Fine-grain  
481 atlases of functional modes for fmri analysis. *arXiv preprint arXiv:2003.05405*.
- 482 De Groot, M., Vernooij, M. W., Klein, S., Ikram, M. A., Vos, F. M., Smith, S. M., Niessen, W. J., and Andersson, J. L. (2013). Improving alignment  
483 in tract-based spatial statistics: evaluation and optimization of image registration. *Neuroimage*, 76:400–411.
- 484 Den Heijer, T., Launer, L., Prins, N., Van Dijk, E., Vermeer, S., Hofman, A., Koudstaal, P., and Breteler, M. (2005). Association between blood  
485 pressure, white matter lesions, and atrophy of the medial temporal lobe. *Neurology*, 64(2):263–267.
- 486 Douaud, G., Groves, A. R., Tammes, C. K., Westlye, L. T., Duff, E. P., Engvig, A., Walhovd, K. B., James, A., Gass, A., Monsch, A. U., et al. (2014).  
487 A common brain network links development, aging, and vulnerability to disease. *Proceedings of the National Academy of Sciences*,  
488 111(49):17648–17653.
- 489 Eickhoff, S. B., Yeo, B. T., and Genon, S. (2018). Imaging-based parcellations of the human brain. *Nature Reviews Neuroscience*, 19(11):672–  
490 686.
- 491 Elliott, L. T., Sharp, K., Alfaro-Almagro, F., Shi, S., Miller, K. L., Douaud, G., Marchini, J., and Smith, S. M. (2018). Genome-wide association  
492 studies of brain imaging phenotypes in UK Biobank. *Nature*, 562(7726):210.
- 493 Fischl, B. (2012). Freesurfer. *Neuroimage*, 62(2):774–781.
- 494 Gilpin, L. H., Bau, D., Yuan, B. Z., Bajwa, A., Specter, M., and Kagal, L. (2018). Explaining explanations: An overview of interpretability of  
495 machine learning. In *2018 IEEE 5th International Conference on data science and advanced analytics (DSAA)*, pages 80–89. IEEE.
- 496 Gönen, M. and Alpaydm, E. (2011). Multiple kernel learning algorithms. *The Journal of Machine Learning Research*, 12:2211–2268.
- 497 Gong, W., Beckmann, C. F., and Smith, S. M. (2021). Phenotype discovery from population brain imaging. *Medical Image Analysis*, page  
498 102050.
- 499 Goodfellow, I., Bengio, Y., Courville, A., and Bengio, Y. (2016). *Deep learning*, volume 1. MIT press Cambridge.
- 500 Griffanti, L., Zamboni, G., Khan, A., Li, L., Bonifacio, G., Sundaresan, V., Schulz, U. G., Kuker, W., Battaglini, M., Rothwell, P. M., et al. (2016).  
501 BIANCA (brain tissue abnormality classification algorithm): a new tool for automated segmentation of white matter hyperintensities.  
502 *NeuroImage*, 141:191–205.
- 503 Groves, A. R., Beckmann, C. F., Smith, S. M., and Woolrich, M. W. (2011). Linked independent component analysis for multimodal data  
504 fusion. *Neuroimage*, 54(3):2198–2217.
- 505 Hannawi, Y., Yanek, L. R., Kral, B. G., Vaidya, D., Becker, L. C., Becker, D. M., and Nyquist, P. A. (2018). Hypertension is associated with white  
506 matter disruption in apparently healthy middle-aged individuals. *American Journal of Neuroradiology*, 39(12):2243–2248.
- 507 He, T., Kong, R., Holmes, A. J., Nguyen, M., Sabuncu, M. R., Eickhoff, S. B., Bzdok, D., Feng, J., and Yeo, B. T. (2020). Deep neural networks and  
508 kernel regression achieve comparable accuracies for functional connectivity prediction of behavior and demographics. *NeuroImage*,  
509 206:116276.
- 510 Ioffe, S. and Szegedy, C. (2015). Batch normalization: Accelerating deep network training by reducing internal covariate shift. *arXiv preprint*  
511 *arXiv:1502.03167*.
- 512 Jenkinson, M., Beckmann, C. F., Behrens, T. E., Woolrich, M. W., and Smith, S. M. (2012). FSL. *Neuroimage*, 62(2):782–790.
- 513 Jollans, L., Boyle, R., Artiges, E., Banaschewski, T., Desrivieres, S., Grigis, A., Martinot, J.-L., Paus, T., Smolka, M. N., Walter, H., et al. (2019).  
514 Quantifying performance of machine learning methods for neuroimaging data. *NeuroImage*.
- 515 Kendall, A., Gal, Y., and Cipolla, R. (2018). Multi-task learning using uncertainty to weigh losses for scene geometry and semantics. In  
516 *Proceedings of the IEEE Conference on Computer Vision and Pattern Recognition*, pages 7482–7491.
- 517 Kingma, D. P. and Ba, J. (2014). Adam: A method for stochastic optimization. *arXiv preprint arXiv:1412.6980*.
- 518 Lawrence, N. (2005). Probabilistic non-linear principal component analysis with gaussian process latent variable models. *Journal of*  
519 *machine learning research*, 6(Nov):1783–1816.
- 520 Le, Q. V., Karpenko, A., Ngiam, J., and Ng, A. Y. (2011). Ica with reconstruction cost for efficient overcomplete feature learning. In *Advances*  
521 *in neural information processing systems*, pages 1017–1025.
- 522 Lee, G., Nho, K., Kang, B., Sohn, K.-A., and Kim, D. (2019). Predicting alzheimer's disease progression using multi-modal deep learning  
523 approach. *Scientific reports*, 9(1):1–12.
- 524 Li, X., Liang, Y., Chen, Y., Zhang, J., Wei, D., Chen, K., Shu, N., Reiman, E. M., and Zhang, Z. (2015). Disrupted frontoparietal network  
525 mediates white matter structure dysfunction associated with cognitive decline in hypertension patients. *Journal of Neuroscience*,  
526 35(27):10015–10024.
- 527 Liu, D. C. and Nocedal, J. (1989). On the limited memory bfgs method for large scale optimization. *Mathematical programming*, 45(1-  
528 3):503–528.
- 529 Liu, Y., Fan, L., Zhang, C., Zhou, T., Xiao, Z., Geng, L., and Shen, D. (2020). Incomplete multi-modal representation learning for alzheimer's  
530 disease diagnosis. *Medical Image Analysis*, page 101953.
- 531 Lu, D., Popuri, K., Ding, G. W., Balachandar, R., Beg, M. F., Initiative, A. D. N., et al. (2018). Multiscale deep neural network based analysis of  
532 fdg-pet images for the early diagnosis of alzheimer's disease. *Medical image analysis*, 46:26–34.

- 533 Marquand, A. F., Brammer, M., Williams, S. C., and Doyle, O. M. (2014). Bayesian multi-task learning for decoding multi-subject neuro-  
534 roimaging data. *NeuroImage*, 92:298–311.
- 535 Menary, K., Collins, P. F., Porter, J. N., Muetzel, R., Olson, E. A., Kumar, V., Steinbach, M., Lim, K. O., and Luciana, M. (2013). Associations  
536 between cortical thickness and general intelligence in children, adolescents and young adults. *Intelligence*, 41(5):597–606.
- 537 Miller, K. L., Alfaro-Almagro, F., Bangerter, N. K., Thomas, D. L., Yacoub, E., Xu, J., Bartsch, A. J., Jbabdi, S., Sotiropoulos, S. N., Andersson,  
538 J. L., et al. (2016). Multimodal population brain imaging in the UK Biobank prospective epidemiological study. *Nature neuroscience*,  
539 19(11):1523–1536.
- 540 Mitchell, T. J. and Beauchamp, J. J. (1988). Bayesian variable selection in linear regression. *Journal of the american statistical association*,  
541 83(404):1023–1032.
- 542 Nguyen, M., He, T., An, L., Alexander, D. C., Feng, J., Yeo, B. T., Initiative, A. D. N., et al. (2020). Predicting alzheimer’s disease progression  
543 using deep recurrent neural networks. *NeuroImage*, 222:117203.
- 544 Pan, S. J. and Yang, Q. (2009). A survey on transfer learning. *IEEE Transactions on knowledge and data engineering*, 22(10):1345–1359.
- 545 Park, T. and Casella, G. (2008). The bayesian lasso. *Journal of the American Statistical Association*, 103(482):681–686.
- 546 Peng, H., Gong, W., Beckmann, C. F., Vedaldi, A., and Smith, S. M. (2019). Accurate brain age prediction with lightweight deep neural  
547 networks. *BioRxiv*.
- 548 Penny, W. D., Friston, K. J., Ashburner, J. T., Kiebel, S. J., and Nichols, T. E. (2011). *Statistical parametric mapping: the analysis of functional*  
549 *brain images*. Elsevier.
- 550 Qi, S., Calhoun, V. D., van Erp, T. G., Bustillo, J., Damaraju, E., Turner, J. A., Du, Y., Yang, J., Chen, J., Yu, Q., et al. (2017). Multimodal fusion  
551 with reference: searching for joint neuromarkers of working memory deficits in schizophrenia. *IEEE transactions on medical imaging*,  
552 37(1):93–105.
- 553 Qi, S., Yang, X., Zhao, L., Calhoun, V. D., Perrone-Bizzozero, N., Liu, S., Jiang, R., Jiang, T., Sui, J., and Ma, X. (2018). MicroRNA132 associated  
554 multimodal neuroimaging patterns in unmedicated major depressive disorder. *Brain*, 141(3):916–926.
- 555 Rahim, M., Thirion, B., Bzdok, D., Buvat, I., and Varoquaux, G. (2017). Joint prediction of multiple scores captures better individual traits  
556 from brain images. *Neuroimage*, 158:145–154.
- 557 Santarnecchi, E., Emmendorfer, A., Tadayon, S., Rossi, S., Rossi, A., and Pascual-Leone, A. (2017). Network connectivity correlates of  
558 variability in fluid intelligence performance. *Intelligence*, 65:35–47.
- 559 Schulz, M.-A., Yeo, B. T., Vogelstein, J. T., Mourao-Miranada, J., Kather, J. N., Kording, K., Richards, B., and Bzdok, D. (2020). Different scaling  
560 of linear models and deep learning in ukbiobank brain images versus machine-learning datasets. *Nature communications*, 11(1):1–15.
- 561 Smith, S. M., Elliott, L. T., Alfaro-Almagro, F., McCarthy, P., Nichols, T. E., Douaud, G., and Miller, K. L. (2020). Brain aging comprises many  
562 modes of structural and functional change with distinct genetic and biophysical associations. *Elife*, 9:e52677.
- 563 Smith, S. M., Jenkinson, M., Johansen-Berg, H., Rueckert, D., Nichols, T. E., Mackay, C. E., Watkins, K. E., Ciccarelli, O., Cader, M. Z.,  
564 Matthews, P. M., et al. (2006). Tract-based spatial statistics: voxelwise analysis of multi-subject diffusion data. *Neuroimage*, 31(4):1487–  
565 1505.
- 566 Smith, S. M., Jenkinson, M., Woolrich, M. W., Beckmann, C. F., Behrens, T. E., Johansen-Berg, H., Bannister, P. R., De Luca, M., Drobnjak, I.,  
567 Flitney, D. E., et al. (2004). Advances in functional and structural mr image analysis and implementation as FSL. *Neuroimage*, 23:S208–  
568 S219.
- 569 Srivastava, N., Hinton, G., Krizhevsky, A., Sutskever, I., and Salakhutdinov, R. (2014). Dropout: a simple way to prevent neural networks  
570 from overfitting. *The journal of machine learning research*, 15(1):1929–1958.
- 571 Sui, J., Qi, S., van Erp, T. G., Bustillo, J., Jiang, R., Lin, D., Turner, J. A., Damaraju, E., Mayer, A. R., Cui, Y., et al. (2018). Multimodal  
572 neuromarkers in schizophrenia via cognition-guided mri fusion. *Nature communications*, 9(1):1–14.
- 573 Sutskever, I., Martens, J., Dahl, G., and Hinton, G. (2013). On the importance of initialization and momentum in deep learning. In *Internation-*  
574 *ational conference on machine learning*, pages 1139–1147.
- 575 Tieleman, T. and Hinton, G. (2012). Lecture 6.5-rmsprop: Divide the gradient by a running average of its recent magnitude. *COURSERA:*  
576 *Neural networks for machine learning*, 4(2):26–31.
- 577 Uludağ, K. and Roebroeck, A. (2014). General overview on the merits of multimodal neuroimaging data fusion. *Neuroimage*, 102:3–10.
- 578 Varoquaux, G., Gramfort, A., Pedregosa, F., Michel, V., and Thirion, B. (2011). Multi-subject dictionary learning to segment an atlas of brain  
579 spontaneous activity. In *Biennial International Conference on information processing in medical imaging*, pages 562–573. Springer.
- 580 Wang, Z., Zhu, X., Adeli, E., Zhu, Y., Nie, F., Munsell, B., Wu, G., et al. (2017). Multi-modal classification of neurodegenerative disease by  
581 progressive graph-based transductive learning. *Medical image analysis*, 39:218–230.
- 582 Wipf, D. P. and Nagarajan, S. S. (2008). A new view of automatic relevance determination. In *Advances in neural information processing*  
583 *systems*, pages 1625–1632.
- 584 Zhang, D., Shen, D., Initiative, A. D. N., et al. (2012a). Multi-modal multi-task learning for joint prediction of multiple regression and  
585 classification variables in alzheimer’s disease. *NeuroImage*, 59(2):895–907.
- 586 Zhang, H., Schneider, T., Wheeler-Kingshott, C. A., and Alexander, D. C. (2012b). NODDI: practical in vivo neurite orientation dispersion  
587 and density imaging of the human brain. *Neuroimage*, 61(4):1000–1016.
- 588 Zhang, Y. and Yang, Q. (2017). A survey on multi-task learning. *arXiv preprint arXiv:1707.08114*.
- 589 Zhou, T., Thung, K.-H., Liu, M., Shi, F., Zhang, C., and Shen, D. (2020). Multi-modal latent space inducing ensemble svm classifier for early  
590 dementia diagnosis with neuroimaging data. *Medical Image Analysis*, 60:101630.
- 591 Zou, H. and Hastie, T. (2005). Regularization and variable selection via the elastic net. *Journal of the royal statistical society: series B*  
592 *(statistical methodology)*, 67(2):301–320.

## 593 Appendix A.

**Table A.2:** A description of 47 Modalities of UKB dataset used in this paper.

| <b>Abbreviation</b> | <b>full description</b>                                                                    |
|---------------------|--------------------------------------------------------------------------------------------|
| rest k (k=1-25)     | Dual regression between IC k of 25 dimensional decomposition of rsfMRI and the whole brain |
| task z1             | Z-statistics of emotion task contrast "shapes"                                             |
| task z2             | Z-statistics of emotion task contrast "face"                                               |
| task z5             | Z-statistics of emotion task contrast "faces>shapes"                                       |
| task c1             | Contrasts of parameter estimate of emotion task contrast "shapes"                          |
| task c2             | Contrasts of parameter estimate of emotion task contrast "face"                            |
| task c5             | Contrasts of parameter estimate of emotion task contrast "faces>shapes"                    |
| TBSS-FA             | Tract-Based Spatial Statistics - fractional anisotropy                                     |
| TBSS-MD             | Tract-Based Spatial Statistics - mean diffusivity                                          |
| TBSS-MO             | Tract-Based Spatial Statistics - tensor mode                                               |
| TBSS-L1             | Tract-Based Spatial Statistics - amount of diffusion along the principal directions 1      |
| TBSS-L2             | Tract-Based Spatial Statistics - amount of diffusion along the principal directions 2      |
| TBSS-L3             | Tract-Based Spatial Statistics - amount of diffusion along the principal directions 3      |
| TBSS-OD             | Tract-Based Spatial Statistics - orientation dispersion index                              |
| TBSS-ICVF           | Tract-Based Spatial Statistics - intra-cellular volume fraction                            |
| TBSS-ISOVF          | Tract-Based Spatial Statistics - isotropic or free water volume fraction                   |
| tracts              | summed tractography map of 27 tracts from AutoPtx in FSL                                   |
| VBM                 | voxel-based morphometry                                                                    |
| Area                | Cortical surface area from Freesurfer                                                      |
| Thickness           | Cortical surface thickness from Freesurfer                                                 |
| Jacobian            | Jacobian map of nonlinear registration of T1 image to MNI152 standard space                |
| swMRI               | T2* image derived from swMRI                                                               |
| T2 lesion           | White matter hyperintensity map estimated by BIANCA                                        |



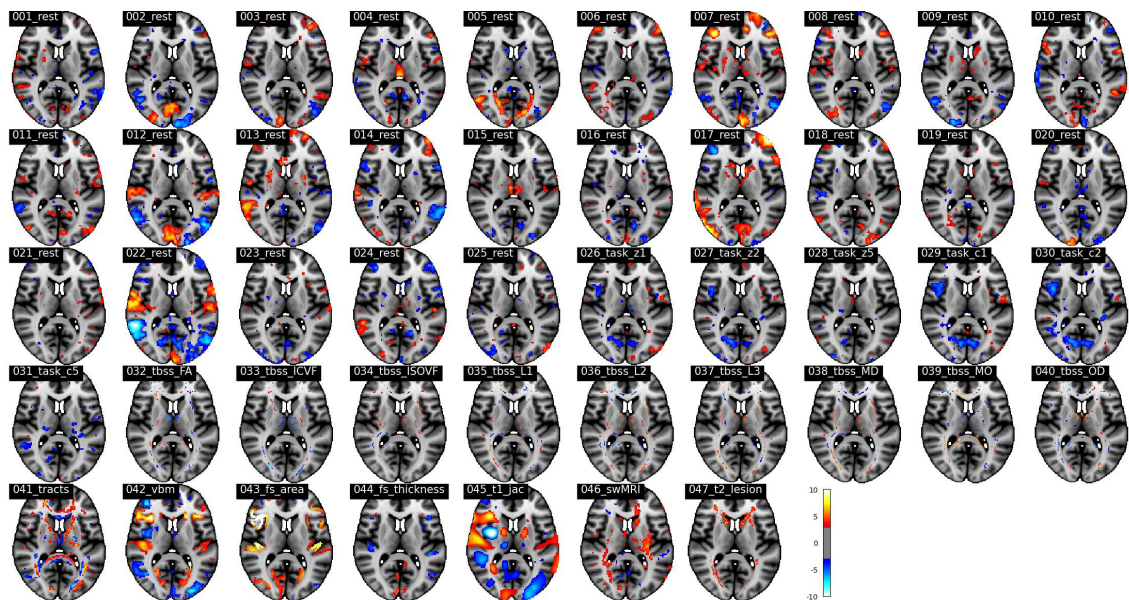

**Figure A.6:** The Z-score normalized spatial maps of the strongest modes that contributing to the prediction of *hypertension* in a 1,000-dimensional SuperBigFLICA, with all 17,485 nIDPs as supervision targets (MNI152 coordinate z=10).

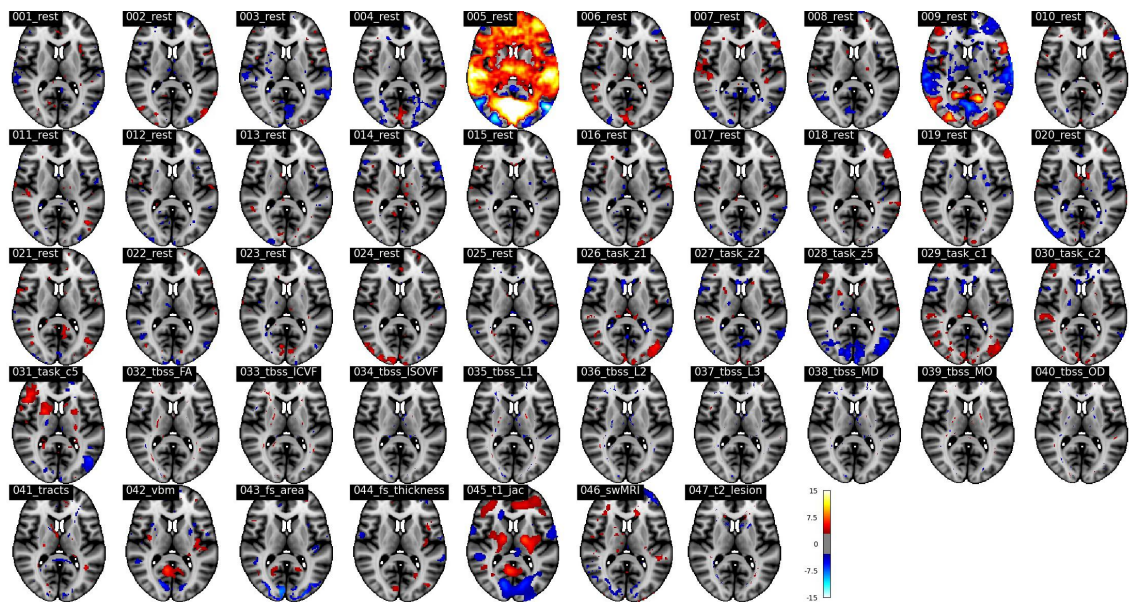

**Figure A.7:** The Z-score normalized spatial maps of the strongest modes that contributing to the prediction of *age started wearing glasses or contact lenses* in a 1,000-dimensional SuperBigFLICA, with all 17,485 nIDPs as supervision targets (MNI152 coordinate  $z=10$ ).
